# Supplementary material
Source: PubMed Central journal article supplement (PMC6138529)
Supplement: NIHMS982240-supplement-Supplemental.pdf [file NIHMS982240-supplement-Supplemental.pdf]

## Supplementary Data

### **Insights into PRRSV viral ovarian tumor domain protease specificity for ubiquitin and interferon-stimulated gene product 15**

Stephanie M. Bester<sup>1#</sup>, Courtney M. Daczkowski<sup>1#</sup>,

Kay S. Faaberg<sup>2\*</sup>, Scott D. Pegan<sup>1\*</sup>

<sup>1</sup>*Department of Pharmaceutical and Biomedical Sciences, University of Georgia, Athens,  
Georgia, USA*

<sup>2</sup>*Virus and Prion Research Unit, USDA-ARS-National Animal Disease Center, Ames, IA 50010,  
USA*

<sup>#</sup>*Equal contribution.*

#### **Table of Contents**

Page S2: Supplementary Figures

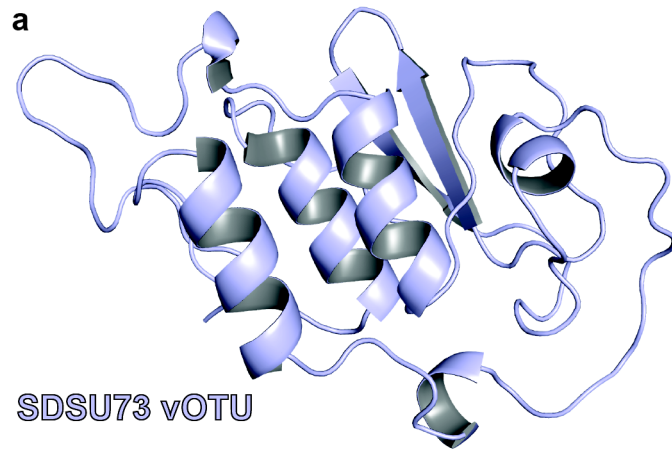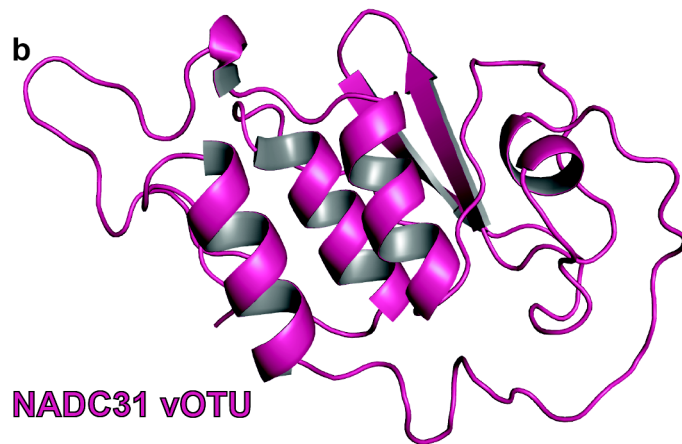

**Supplementary Figure 1. Model of the vOTU domain of PRRSV Strains, SDSU73 & NADC31.** (a) A cartoon representation of a homology model for PRRSV SDSU73 vOTU (light purple), and (b) PRRSV NADC31 vOTU (magenta) built from EAV PLP2 (PDB 4IUM).
